# Supplementary material
Source: publisher site journal article supplement (https://static.cambridge.org/content/id/urn:cambridge.org:id:article:S1368980019001290/resource/name/S1368980019001290supp001.docx)
Supplement: Supplementary file 1 [file S1368980019001290supp001.docx]

**Supplementary table. Cox proportional hazards regression analysis for time to pregnancy as a function of male Alternative Healthy Eating Index for Pregnancy (AHEI-P)8 score (tertile) and selected covariates for ISIS participants (n = 117 couples). Hazard Ratio (HR) with 95% Confidence Intervals (95% CI) for time to pregnancy outcomesa**

|  | HR (95% CI) | *P*-value |
| --- | --- | --- |
| *Clinical pregnancy (n = 80)* | | |
| Model 1b |  |  |
| AHEI-P medium | 1.18 (0.64-2.19) | 0.60 |
| AHEI-P high | 1.24 (0.69-2.24) | 0.48 |
| Model 2c |  |  |
| AHEI-P medium | 1.28 (0.67-2.44) | 0.45 |
| AHEI-P high | 1.30 (0.69-2.43) | 0.42 |
| Model 3d |  |  |
| AHEI-P medium | 1.44 (0.69-3.03) | 0.34 |
| AHEI-P high | 1.47 (0.71-3.06) | 0.30 |
| *Clinical pregnancy that resulted in live birth (n = 69)* | | |
| Model 1b |  |  |
| AHEI-P medium | 1.29 (0.66-2.49) | 0.46 |
| AHEI-P high | 1.20 (0.62-2.29) | 0.59 |
| Model 2c |  |  |
| AHEI-P medium | 1.39 (0.70-2.78) | 0.35 |
| AHEI-P high | 1.25 (0.63-2.49) | 0.53 |
| Model 3d |  |  |
| AHEI-P medium | 1.41 (0.65-3.08) | 0.39 |
| AHEI-P high | 1.29 (0.59-2.81) | 0.52 |
| *Pregnancy loss (n = 11)* | | |
| Model 1b |  |  |
| AHEI-P medium | 1.04 (0.16-6.76) | 0.96 |
| AHEI-P high | 0.65 (0.14-3.09) | 0.59 |
| Model 2c |  |  |
| AHEI-P medium | 1.02 (0.16-6.74) | 0.98 |
| AHEI-P high | 0.54 (0.10-2.97) | 0.48 |
| Model 3d |  |  |
| AHEI-P medium | 2.75 (0.26-28.95) | 0.40 |
| AHEI-P high | 1.22 (0.12-12.18) | 0.86 |

a The sample size does not include the n = 15 who were censored at baseline visit. All covariates are for the female unless otherwise indicated. The reference group is the lowest tertile of AHEI-P. *P*-values determined by Cox proportional hazards regression.

b. Adjusted for age and energy intake

c. Adjusted for age, energy intake, and BMI

d. Adjusted for age, energy intake, BMI, male education, and male smoking status
